# Supplementary material for: Superamphiphilic carbon from sawdust activated by oxygen/argon mixtures promoting the oxidation of benzyl alcohol in Pickering emulsion
Source: Royal Society of Chemistry journal article supplement (doi:10.1039/d1gc01776d), 2021-01-01
Supplement: d1gc01776d1.pdf [file d1gc01776d1.pdf]

## Supporting Information

### Superamphiphilic carbon from sawdust activated by oxygen/argon mixtures promoting oxidation of benzyl alcohol in Pickering emulsion

Honglei Fan,<sup>\*a</sup> Bingfeng Chen,<sup>a</sup> Chunjun Chen,<sup>a</sup> Zhaofu Zhang,<sup>a</sup> Jinliang Song,<sup>a</sup> Guanying Yang<sup>a</sup> and Buxing Han<sup>\*a,b</sup>

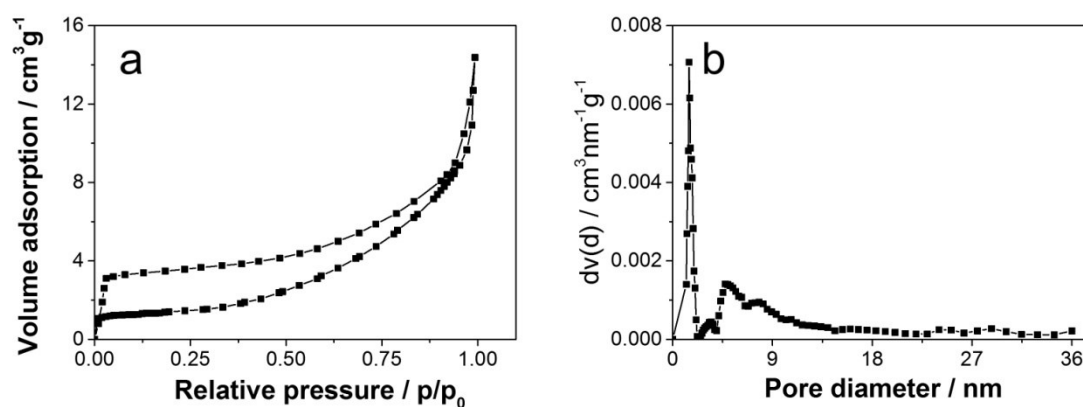

Figure S1 (a). Nitrogen sorption isotherms of hydrophobic carbon. (b). Pore size distribution of hydrophobic carbon.

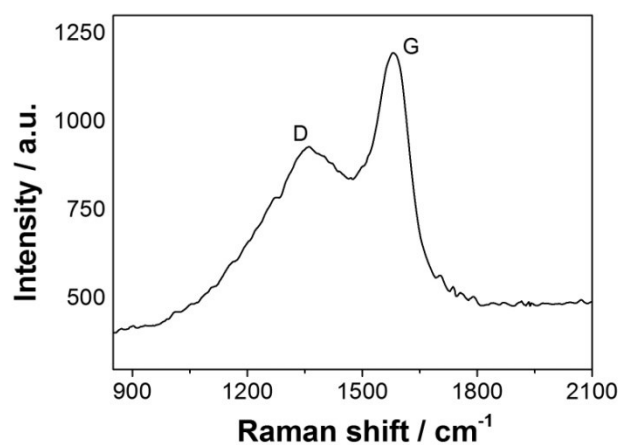

Figure S2 Raman spectrum of hydrophobic carbon.
